# Supplementary material for: Serum Calcification Propensity and Calcification of the Abdominal Aorta in Patients With Primary Aldosteronism
Source: PubMed Central journal article supplement (PMC8818752; doi:10.3389/fcvm.2022.771096), 2022-01-24
Supplement: Data_Sheet_1.pdf [file Data_Sheet_1.pdf]

## Supplementary Material

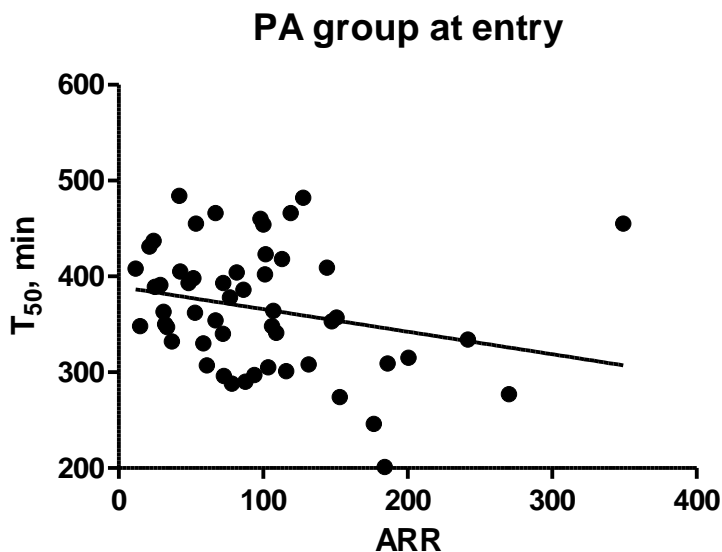

Figure 1. Relationship between calcification propensity and aldosterone renin ratio (ARR) at study entry among patients diagnosed with PA.  $T_{50}$  represents the half maximal transformation time of primary calciprotein particles to secondary ones and is expressed in minutes. At study entry a negative relationship between  $T_{50}$  and ARR ( $r -0.282$ ,  $p < 0.05$ ) was observed.

| Variable  | All patients |              | PA      |              | RH      |              |
|-----------|--------------|--------------|---------|--------------|---------|--------------|
|           | $\beta$      | p            | $\beta$ | p            | $\beta$ | p            |
| Phosphate | - 0.320      | <b>0.031</b> |         |              | - 0.170 | 0.297        |
| HDL       | 0.012        | 0.938        |         |              | 0.605   | <b>0.001</b> |
| ACSVD     | - 0.252      | 0.160        | - 0.134 | 0.397        |         |              |
| ARR       |              |              | - 0.365 | <b>0.025</b> | 0.355   | <b>0.019</b> |

Table 1. Multivariate linear regression model assessing the relationship between calcification propensity ( $T_{50}$ ) measured at the study entry and various variables. PA – primary aldosteronism, RH – resistant hypertension. HDL – high density lipoprotein, ACSVD - Atherosclerotic cardiovascular disease score, ARR – aldosterone renin ratio,  $\beta$  – correlation coefficient. Variables which showed a significant relationship with calcification propensity ( $T_{50}$ ) in univariate regression analysis were included into multivariate analysis. Significance with  $p < 0.05$

|                                 | PA                  |                     | RH                 |                 |
|---------------------------------|---------------------|---------------------|--------------------|-----------------|
|                                 | At entry            | Follow up           | At entry           | Follow up       |
| Number of patients              | 66                  | 22                  | 28                 | 28              |
| M:F                             | 1.8:1               | 1:1                 | 1.8:1              | 1.8:1           |
| Age, y                          | 53.5 ± 12.4         | 53.0 ± 10.1         | 58.0 ± 11.2        | 59.1 ± 12.3     |
| SBP, mmHg                       | 154 ± 11            | 128 ± 19*           | 156 ± 21           | 150 ± 25        |
| DBP, mmHg                       | 88 ± 8              | 77 ± 10*            | 91 ± 10            | 89 ± 12         |
| ACSVD score, %                  | 9.6 (4.7 – 16.8)    | 12.2 ± 9.9          | 24.9 (17.5 – 30)   | 20.1 ± 9.0      |
| Aldosterone, ng/L               | 187.3 (119 – 241)   | 120 (66 – 304)      | 99 (42 – 148)      | 91 (63 – 133)   |
| Renin, pg/ml                    | 1.9 (1.2 – 2.8)     | 15 (7.7 – 45)***    | 11 (4.4 – 59)      | 16.0 (5.1 – 69) |
| ARR                             | 85.3 (52.4 – 134.4) | 8.7 (2.5 – 30.3)*** | 4.6 (0.9 – 22.9)   | 4 (0.9 – 15.4)  |
| Potassium mmol/L                | 3.6 ± 0.6           | 4.4 ± 0.3 ***       | 4.1 ± 0.6          | 4.1 ± 0.6       |
| Creatinine, mg/dl               | 0.9 (0.8 – 1.1)     | 1 (0.9 – 1.1)***    | 0.9 (0.8 – 1.3)    | 1 (0.8 – 1.5)   |
| eGFR, ml/min/1.73m <sup>2</sup> | 82 (72.7 – 95.5)    | 74 (61 – 85) ***    | 74.5 (54.5 – 96.5) | 75.5 (45 – 90)* |
| Calcium, mmol/L                 | 2.33 ± 0.1          | 2.37 ± 0.1*         | 2.30 ± 0.1         | 2.34 ± 0.1      |
| Phosphate, mmol/L               | 0.97 ± 0.3          | 1.01 ± 0.2          | 1.01 ± 0.2         | 1.19 ± 0.3**    |
| Magnesium, mmol/L               | 0.83 ± 0.1          | 0.81 ± 0.1          | 0.86 ± 0.1         | 0.86 ± 0.1      |
| Triglyceride, mg/dl             | 127 (96 – 183)      | 166 (120 – 207)**   | 119 (93 – 206)     | 125 (105 – 183) |
| HDL, mg/dl                      | 48 (41 – 61)        | 52 (41 – 69)        | 45 (37 – 57)       | 44 (37 – 55)    |
| Albumin, g/dl                   | 4.4 ± 0.3           | 4.5 ± 0.3           | 4.4 ± 0.5          | 4.6 ± 0.5       |
| CRP, mg/dl                      | 0.3 (0.2 – 0.5)     | 0.3 (0.1 – 0.4)     | 0.4 (0.3 – 1.1)    | 0.3 (0.2 – 0.5) |
| HbA1C, %                        | 5.4 (5.1 – 5.8)     | 5.6 (5.3 – 6)*      | 5.8 (5.6 – 6.4)    | 6.0 (5.5 – 6.5) |
| T <sub>50</sub> , min           | 371 ± 65            | 354 ± 52*           | 382 ± 44           | 367 ± 56        |

Table 2. Characteristics of study population at entry and follow up visit. PA – primary aldosteronism, RH – resistant hypertension, SBP – systolic blood pressure, DBP – diastolic blood pressure, ACSVD – Atherosclerotic cardiovascular disease score, ARR – aldosterone renin ratio, eGFR – estimated glomerular filtration rate, HDL – high density lipoprotein, CRP – C – reactive protein, HbA1C – glycosylated hemoglobin, T<sub>50</sub> – calcification propensity score. Dichotomous data are presented as percentages whereas continuous data as means ± SD or median (Q1 – Q3). \*\*\* represent significant difference between entry and follow up within the group with p < 0.001, \*\* p < 0.01, \* p < 0.05 using paired t-test or Wilcoxon signed rank test.
